# Supplementary material for: Lone pair electron effect induced differences in linear and nonlinear optical properties of bismuth borates
Source: Royal Society of Chemistry journal article supplement (doi:10.1039/c9nj05873g), 2019-12-12
Supplement: c9nj05873g1.pdf [file c9nj05873g1.pdf]

**Electronic Supplementary Information for:**

**Lone Pair Electron Effect Induced Differences in Linear and  
Nonlinear Optical Properties of Bismuth Borates**

Wenbing Cai,<sup>a</sup> Qun Jing,<sup>a</sup> Jun Zhang<sup>\*a</sup>

School of Physics Science and Technology, Xinjiang University, Urumqi, Xinjiang, 830046,  
China

\*Corresponding authors: [zhangjunxju@163.com](mailto:zhangjunxju@163.com)

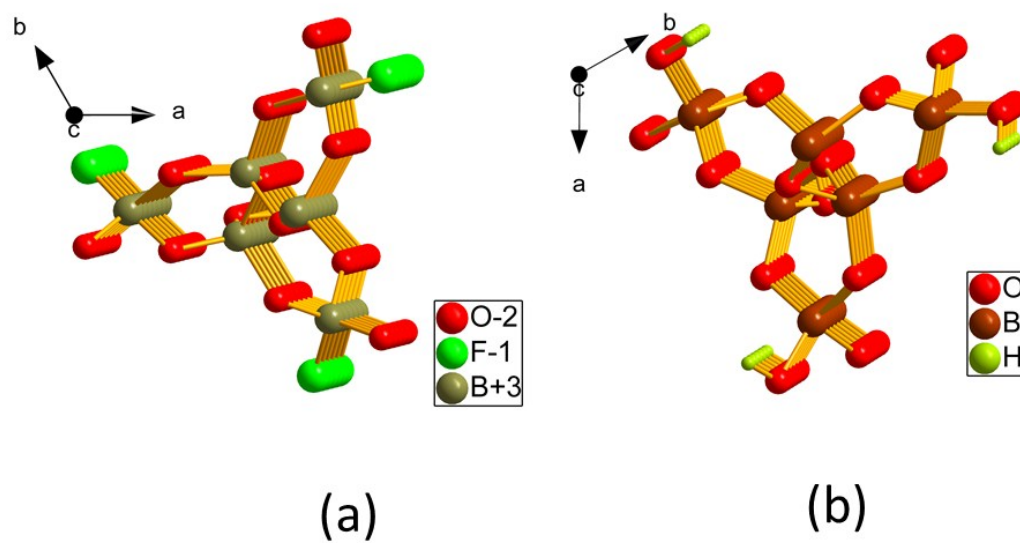

Fig. S1 Anion structure of (a)  $\text{BiB}_2\text{O}_4\text{F}$ , (b)  $\text{BiB}_2\text{O}_4(\text{OH})$

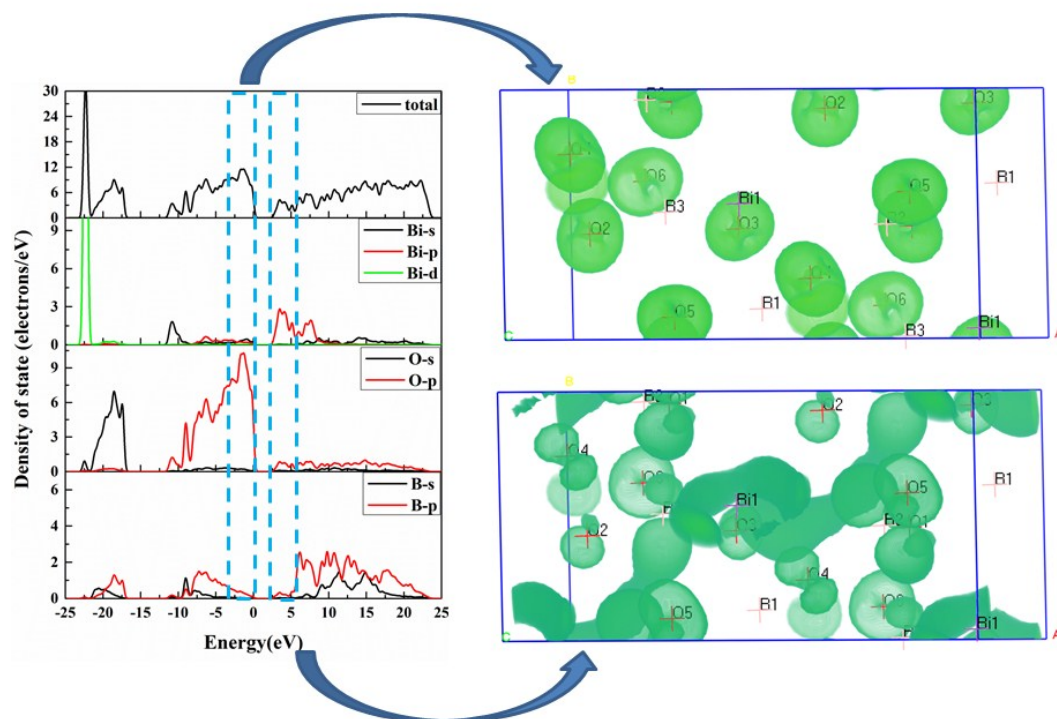

Fig. S2 PDOS/DOS as well as the orbital near the Fermi level of  $\alpha\text{-BiB}_3\text{O}_6$

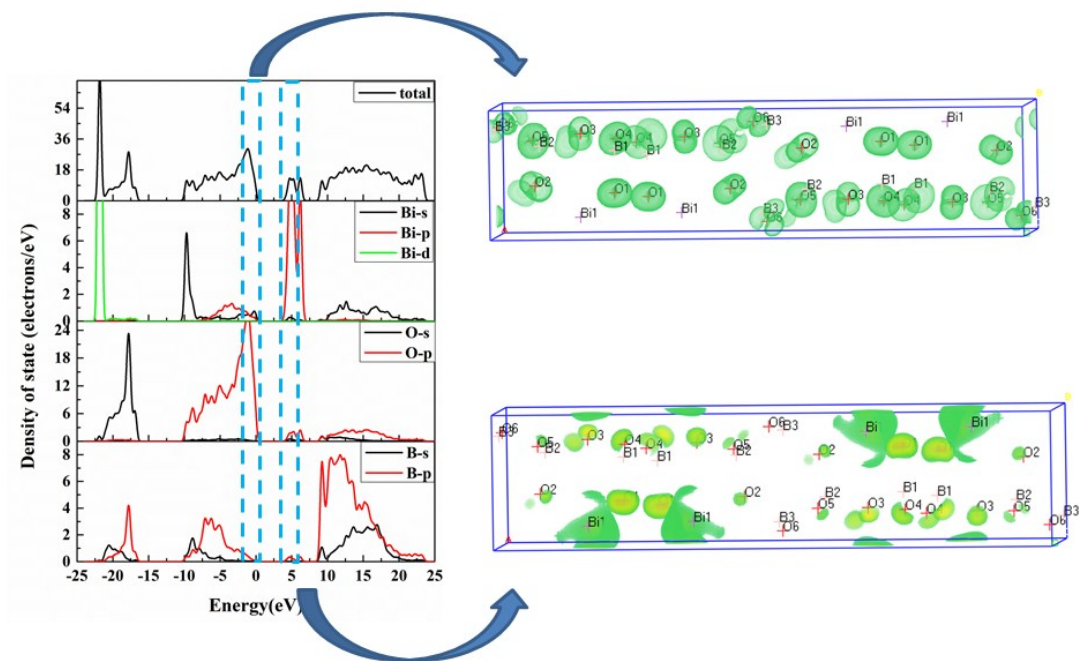

Fig. S3 PDOS/DOS as well as the orbital near the Fermi level of  $\delta$ -BiB<sub>3</sub>O<sub>6</sub>

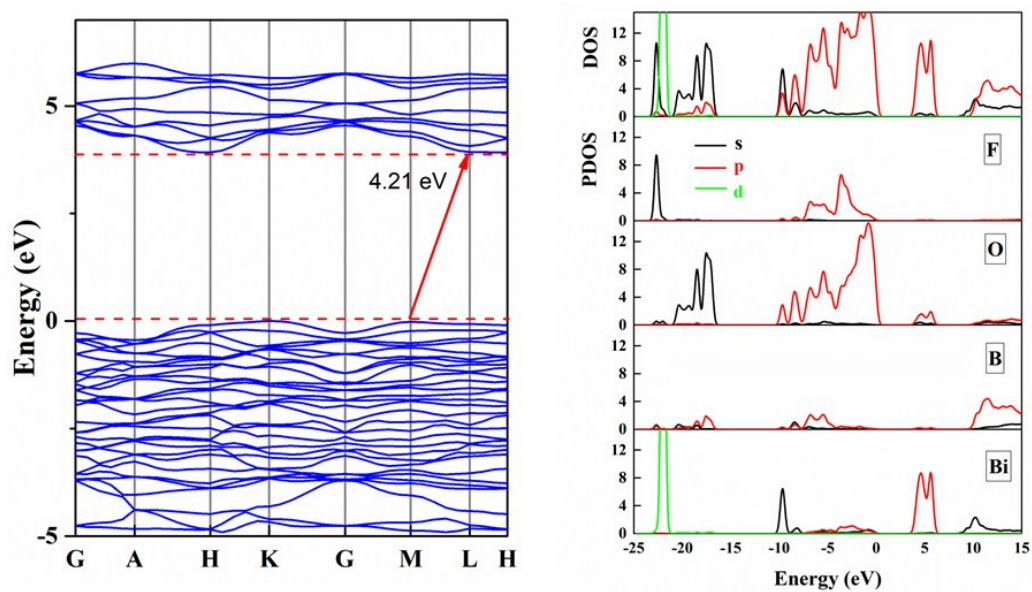

Fig. S4 Electronic band structure and DOS/PDOS of BiB<sub>2</sub>O<sub>4</sub>F

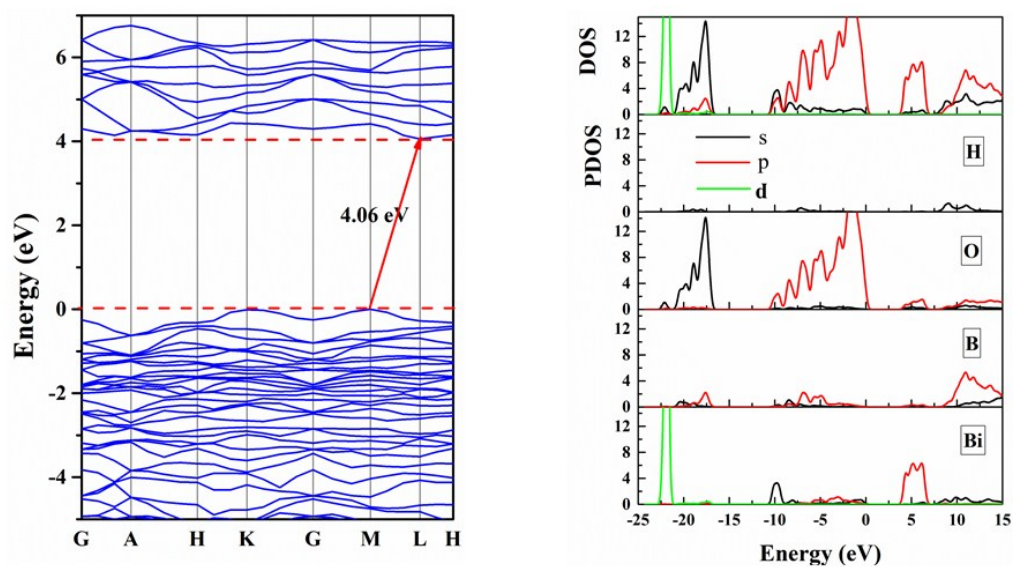

Fig. S5 Electronic band structure and DOS/PDOS of  $\text{BiB}_2\text{O}_4(\text{OH})$

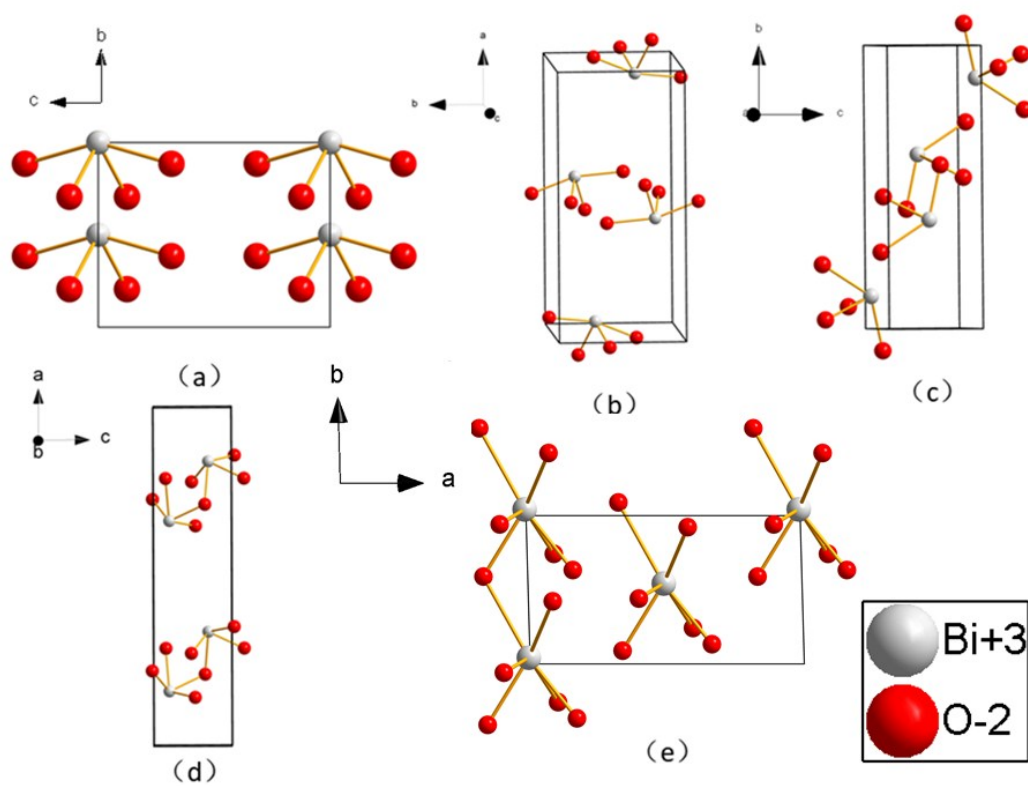

Fig. S6 The arrangement of bismuth oxygen polyhedra (a)  $\alpha\text{-BiB}_3\text{O}_6$ , (b)  $\beta\text{-BiB}_3\text{O}_6$ , (c)  $\gamma\text{-BiB}_3\text{O}_6$ , (d)  $\delta\text{-BiB}_3\text{O}_6$ , (e)  $\epsilon\text{-BiB}_3\text{O}_6$

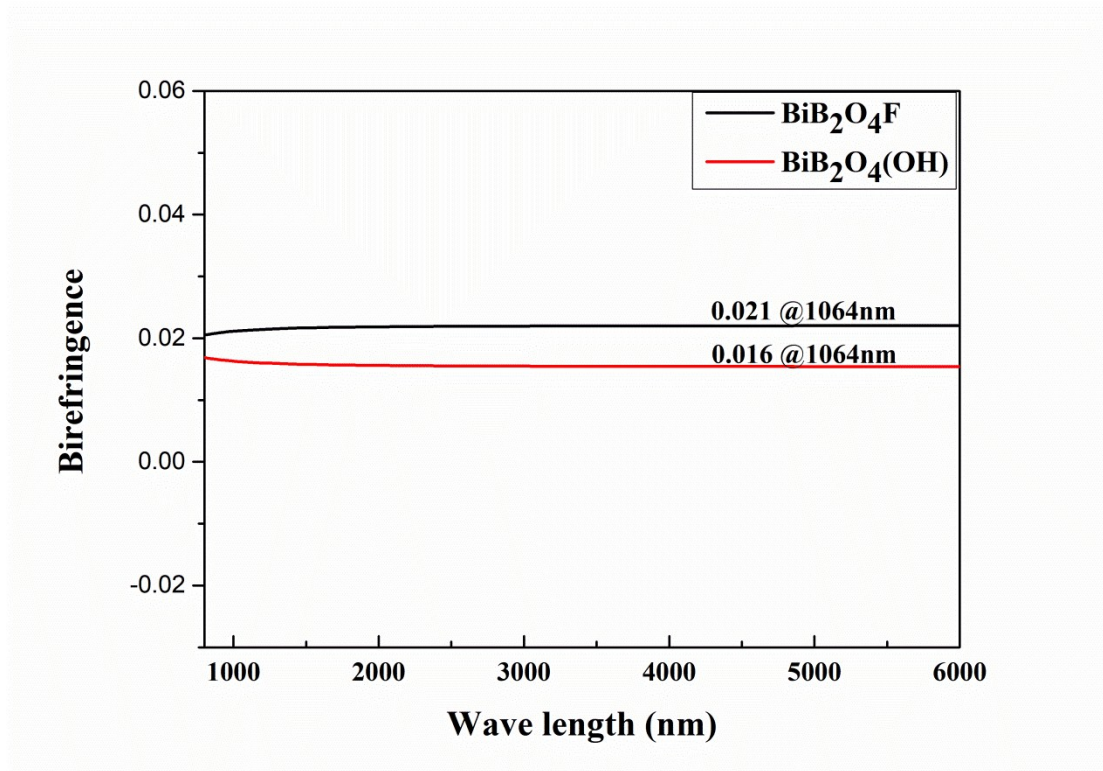

Fig. S7 Birefringence of BiB<sub>2</sub>O<sub>4</sub>F and BiB<sub>2</sub>O<sub>4</sub>(OH)

Table S1 Classification of BIBO and BiB<sub>2</sub>O<sub>4</sub>F and BiB<sub>2</sub>O<sub>4</sub>(OH) according to the type of B-O structure

| compound         | $\alpha$ -BiB <sub>3</sub> O <sub>6</sub> | $\beta$ -BiB <sub>3</sub> O <sub>6</sub> | $\gamma$ -BiB <sub>3</sub> O <sub>6</sub> | $\delta$ -BiB <sub>3</sub> O <sub>6</sub> | $\epsilon$ -BiB <sub>3</sub> O <sub>6</sub> | BiB <sub>2</sub> O <sub>4</sub> F | BiB <sub>2</sub> O <sub>4</sub> (OH) |
|------------------|-------------------------------------------|------------------------------------------|-------------------------------------------|-------------------------------------------|---------------------------------------------|-----------------------------------|--------------------------------------|
| Crystal system   | monoclinic                                | monoclinic                               | monoclinic                                | orthorhombic                              | triclinic                                   | trigonal                          | trigonal                             |
| Space group      | C2                                        | P2 <sub>1</sub> /n                       | P2 <sub>1</sub> /n                        | Pna2 <sub>1</sub>                         | C1                                          | P3 <sub>2</sub>                   | P3 <sub>1</sub>                      |
| structure of B-O | Layered                                   | Layered                                  | 3D                                        | 3D                                        | Layered                                     | chain                             | chain                                |
| FBB              | B <sub>3</sub> O <sub>8</sub>             | B <sub>3</sub> O <sub>8</sub>            | B <sub>3</sub> O <sub>9</sub>             | B <sub>3</sub> O <sub>10</sub>            | B <sub>3</sub> O <sub>8</sub>               | B <sub>3</sub> O <sub>8</sub> F   | B <sub>3</sub> O <sub>9</sub> H      |
| a(Å)             | 7.116                                     | 14.1664                                  | 8.4992                                    | 18.4480                                   | 7.4781                                      | 6.7147                            | 6.6221                               |
| b(Å)             | 4.993                                     | 6.7514                                   | 11.7093                                   | 4.4495                                    | 3.9340                                      | 6.7147                            | 6.6221                               |
| b(Å)             | 6.508                                     | 4.4290                                   | 4.2596                                    | 4.2806                                    | 6.2321                                      | 6.4688                            | 6.6526                               |

Table S2 Birefringence of calculation and experiment of  $\alpha$ -BiB<sub>3</sub>O<sub>6</sub> (about 1064nm)

|             | n <sub>1</sub> | n <sub>2</sub> | n <sub>3</sub> | $\Delta n$ |
|-------------|----------------|----------------|----------------|------------|
| Experiment  | 1.7585         | 1.7854         | 1.9190         | 0.1605     |
| calculation | 1.8648         | 1.8789         | 2.013          | 0.1482     |

**Table S3** Range of bond length and bond angle of  $\text{BO}_3$ , density of  $\text{BO}_3$  in the unit cell, and distance of B atom out of O plane of  $\text{BO}_3$ , and dihedral angle of neighbouring  $\text{BO}_3$

|                                                                     | Bond length (Å) | Bond angle (°)  | Density | Dihedral angle(°) | Distance (Å) |
|---------------------------------------------------------------------|-----------------|-----------------|---------|-------------------|--------------|
| $\text{B}_2\text{O}_3$ ( $\alpha$ -<br>$\text{BiB}_3\text{O}_6$ )   | 1.339-1.411     | 110.443-128.057 | 0.01796 | 89.335            | 0.044        |
| $\text{B}_1\text{O}_3$ ( $\delta$ -<br>$\text{BiB}_3\text{O}_6$ )   | 1.376-1.392     | 116.793-125.29  | 0.00966 | 79.891            | 0.018        |
| $\text{B}_2\text{O}_3$ ( $\epsilon$ -<br>$\text{BiB}_3\text{O}_6$ ) | 1.322-1.478     | 107.458-140.942 | 0.02244 | 47.593            | 0.011        |
| $\text{B}_3\text{O}_3$ ( $\epsilon$ -<br>$\text{BiB}_3\text{O}_6$ ) | 1.340-1.424     | 110.107-134.198 | 0.02244 | 47.593            | 0.02         |

**Table S4** Calculated value of SHG coefficients of  $\alpha$ - $\text{BiB}_3\text{O}_6$  crystal as well as the contribution of each group (unit: pm/V)

|                     | $d_{16}$ | $d_{14}$ | $d_{22}$ | $d_{23}$ |
|---------------------|----------|----------|----------|----------|
| Calculated value    | -4.37    | -1.59    | -4.89    | -1.53    |
| Only Bi-O polyhedra | -3.15    | -1.87    | -3.99    | -0.85    |
| Only $\text{BO}_3$  | -0.49    | 0.40     | -0.54    | 0.09     |
| Only $\text{BO}_4$  | -0.2     | 0.34     | 0.13     | 0.33     |
| Only Bi             | -0.5     | -0.67    | -0.97    | -0.57    |

**Table S5** Calculated value of SHG coefficients of  $\delta$ - $\text{BiB}_3\text{O}_6$  crystal as well as the contribution of each group (unit: pm/V)

|                     | $d_{15}$ | $d_{24}$ | $d_{33}$ |
|---------------------|----------|----------|----------|
| Calculated value    | -1.16    | -0.36    | 4.53     |
| Only Bi-O polyhedra | -0.22    | 0.06     | 3.43     |
| Only $\text{BO}_4$  | -0.86    | -0.56    | 1.25     |
| Only Bi             | -0.22    | -0.24    | 0.43     |
